# Supplementary material for: Trans-Resveratrol Supplementation and Endothelial Function during the Fasting and Postprandial Phase: A Randomized Placebo-Controlled Trial in Overweight and Slightly Obese Participants
Source: MDPI journal article supplement (doi:10.3390/nu9060596), 2017-06-12
Supplement: s1 [file s1]

**Table S2.** Baseline characteristics of the participants

|                                 | Total       | Men         | Women       |
|---------------------------------|-------------|-------------|-------------|
| Age, y                          | 61 ± 7      | 62 ± 7      | 59 ± 7      |
| BMI, kg/m <sup>2</sup>          | 28.3 ± 3.2  | 28.5 ± 2.9  | 29.2 ± 3.6  |
| Systolic BP, mmHg               | 136 ± 17    | 138 ± 16    | 135 ± 18    |
| Diastolic BP, mmHg              | 88 ± 9      | 88 ± 9      | 88 ± 10     |
| Heart rate, BPM                 | 67 ± 8      | 67 ± 8      | 68 ± 7      |
| Plasma glucose, mmol/L          | 5.66 ± 0.53 | 5.71 ± 0.57 | 5.59 ± 0.48 |
| Serum total cholesterol, mmol/L | 6.38 ± 1.00 | 6.20 ± 1.01 | 6.60 ± 1.00 |
| Serum HDL cholesterol, mmol/L   | 1.14 ± 0.23 | 1.00 ± 0.17 | 1.30 ± 0.18 |

Values are means ± SDs, *n* = 45 (25 men and 20 women). BP, blood pressure; BPM, beats per minute
