# Supplementary material for: Trans-Resveratrol Supplementation and Endothelial Function during the Fasting and Postprandial Phase: A Randomized Placebo-Controlled Trial in Overweight and Slightly Obese Participants
Source: MDPI journal article supplement (doi:10.3390/nu9060596), 2017-06-12
Supplement: s1 [file s1]

**Table S1.** Composition of the test meal

| Nutrient                                                                                                                            | 2 muffins | 300 mL<br>Skim milk | Total                   |
|-------------------------------------------------------------------------------------------------------------------------------------|-----------|---------------------|-------------------------|
| Energy, kJ                                                                                                                          | 4095      | 503                 | 4598                    |
| Energy, kcal                                                                                                                        | 980       | 120                 | 1100                    |
| Protein, g                                                                                                                          | 14.5      | 12                  | 26.5 (9.6 % of energy)  |
| Carbohydrates, g                                                                                                                    | 103       | 18                  | 121 (44.0 % of energy)  |
| Total fat, g                                                                                                                        | 56.6      | <0.1                | 56.6 (46.6 % of energy) |
| Saturated fatty acids, g                                                                                                            | 33.9      | 0                   | 33.9 (27.7 % of energy) |
| Trans fatty acids, g                                                                                                                | 2.2       | 0                   | 2.2(1.8 % of energy)    |
| Monounsaturated fatty acids, g                                                                                                      | 14.5      | 0                   | 14.5 (11.9 % of energy) |
| Polyunsaturated fatty acids, g                                                                                                      | 2.7       | 0                   | 2.7 (2.2 % of energy)   |
| Cholesterol, mg                                                                                                                     | 349       | 0                   | 349                     |
| The ingredients needed to prepare two muffins were butter (61.7 g), flour (60 g),<br>sugar (60 g), one egg plus some vanilla sugar. |           |                     |                         |
