# Supplementary figures and images for: Trans-Resveratrol Supplementation and Endothelial Function during the Fasting and Postprandial Phase: A Randomized Placebo-Controlled Trial in Overweight and Slightly Obese Participants
Source: MDPI journal article supplement (doi:10.3390/nu9060596), 2017-06-12

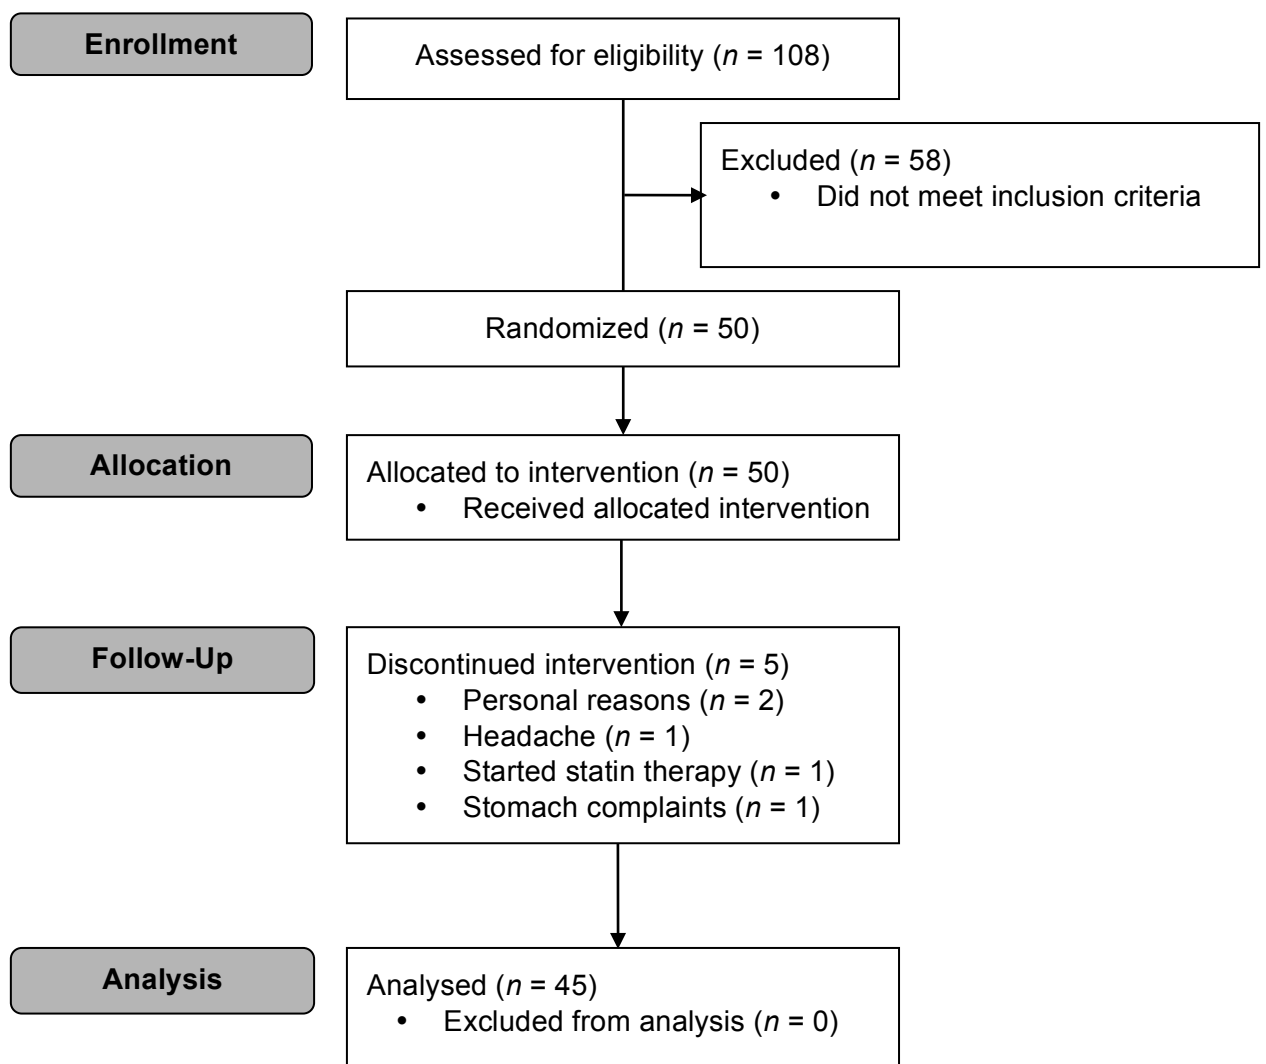

**Figure S1.** Participants flow chart

Supplement: s1 [file s1]
